# Supplementary material
Source: PubMed Central journal article supplement (PMC4464746)
Supplement: supp_WNL.0000000000001675_e-tables.pdf [file supp_WNL.0000000000001675_e-tables.pdf]

**Table e-1. Overview of the results of the application of THC on pain assessments in dementia patients**

|               | n | THC       | n  | Placebo   | Mean difference<br>THC vs placebo<br>(95% CI) |
|---------------|---|-----------|----|-----------|-----------------------------------------------|
| VRS interview |   |           |    |           |                                               |
| Baseline      | 5 | 2.6 (1.3) | 11 | 3.1 (1.8) |                                               |
| Day 21        | 4 | 2.3 (1.0) | 9  | 2.3 (1.0) | -0.03 (-1.0 to 0.9)                           |
| PACSLAC-D     |   |           |    |           |                                               |
| Baseline      | 8 | 8.4 (5.2) | 15 | 7.2 (4.1) |                                               |
| Day 21        | 7 | 7.4 (8.0) | 13 | 6.2 (5.5) | -0.4 (-3.8 to 3.0)                            |

Abbreviations: VRS, Verbal Rating Scale; PACSLAC-D, Pain Assessment Checklist for Seniors with Limited Ability to Communicate-Dutch version.

NOTE. Group numbers are means and standard deviations. Estimates of mean differences are based on linear mixed model analysis for repeated measures with participant as random effects for the subgroup of patients with pain. A negative mean difference favors THC for VRS and PACSLAC-D.

**Table e-2. Study results of the application of THC on neuropsychiatric symptoms in dementia for all subdomains of Neuropsychiatric Inventory**

|                                            | n  | THC       | n  | Placebo   | THC vs. placebo<br>(95% CI) |
|--------------------------------------------|----|-----------|----|-----------|-----------------------------|
| <b>NPI delusions</b>                       |    |           |    |           |                             |
| Baseline                                   | 24 | 1.8 (3.0) | 26 | 1.8 (3.3) |                             |
| Day 14                                     | 19 | 1.9 (3.6) | 23 | 1.3 (2.6) |                             |
| Day 21                                     | 23 | 2.0 (3.5) | 24 | 1.5 (2.7) | +0.7 (-0.5 to 1.9)          |
| <b>NPI hallucinations</b>                  |    |           |    |           |                             |
| Baseline                                   | 24 | 0.8 (2.6) | 26 | 0.3 (1.2) |                             |
| Day 14                                     | 19 | 0.3 (1.4) | 23 | 0.3 (1.7) |                             |
| Day 21                                     | 23 | 0.0 (0.2) | 24 | 0.3 (1.2) | -0.2 (-0.9 to 0.4)          |
| <b>NPI agitation/aggression</b>            |    |           |    |           |                             |
| Baseline                                   | 24 | 5.7 (3.8) | 26 | 6.2 (4.3) |                             |
| Day 14                                     | 19 | 4.1 (4.7) | 23 | 5.0 (3.9) |                             |
| Day 21                                     | 23 | 4.5 (4.1) | 24 | 4.4 (4.3) | -0.1 (-2.0 to 1.9)          |
| <b>NPI dysphoria</b>                       |    |           |    |           |                             |
| Baseline                                   | 24 | 2.9 (4.0) | 26 | 3.4 (3.6) |                             |
| Day 14                                     | 19 | 1.6 (2.4) | 23 | 2.1 (2.7) |                             |
| Day 21                                     | 23 | 2.3 (2.6) | 24 | 1.8 (2.8) | 0.0 (-1.0 to 1.1)           |
| <b>NPI anxiety</b>                         |    |           |    |           |                             |
| Baseline                                   | 24 | 2.5 (4.0) | 26 | 2.6 (3.7) |                             |
| Day 14                                     | 19 | 2.1 (3.5) | 23 | 1.0 (2.6) |                             |
| Day 21                                     | 23 | 1.5 (2.8) | 24 | 1.3 (2.3) | +0.5 (-0.7 to 1.8)          |
| <b>NPI euphoria</b>                        |    |           |    |           |                             |
| Baseline                                   | 24 | 1.0 (2.5) | 26 | 0.3 (0.9) |                             |
| Day 14                                     | 19 | 0.3 (1.4) | 23 | 0.3 (1.7) |                             |
| Day 21                                     | 23 | 0.5 (1.3) | 24 | 0.0 (0.2) | +0.1 (-0.5 to 0.6)          |
| <b>NPI apathy</b>                          |    |           |    |           |                             |
| Baseline                                   | 24 | 5.0 (3.7) | 26 | 2.5 (3.1) |                             |
| Day 14                                     | 19 | 5.1 (3.5) | 23 | 2.4 (3.3) |                             |
| Day 21                                     | 23 | 4.1 (3.4) | 24 | 2.3 (3.1) | +0.1 (-1.1 to 1.3)          |
| <b>NPI disinhibition</b>                   |    |           |    |           |                             |
| Baseline                                   | 24 | 2.5 (3.3) | 26 | 3.1 (3.4) |                             |
| Day 14                                     | 19 | 1.5 (2.6) | 23 | 2.1 (3.0) |                             |
| Day 21                                     | 23 | 2.1 (3.2) | 24 | 2.4 (3.4) | -0.1 (-1.6 to 1.4)          |
| <b>NPI irritability</b>                    |    |           |    |           |                             |
| Baseline                                   | 24 | 5.3 (4.3) | 26 | 5.7 (4.8) |                             |
| Day 14                                     | 19 | 5.1 (4.0) | 23 | 4.2 (3.8) |                             |
| Day 21                                     | 23 | 4.3 (4.1) | 24 | 3.9 (4.1) | +0.7 (-1.1 to 2.4)          |
| <b>NPI aberrant motor behavior</b>         |    |           |    |           |                             |
| Baseline                                   | 24 | 4.5 (4.6) | 26 | 5.2 (4.1) |                             |
| Day 14                                     | 19 | 4.9 (4.0) | 23 | 4.3 (4.2) |                             |
| Day 21                                     | 23 | 3.6 (3.9) | 24 | 3.7 (4.3) | +0.3 (-1.0 to 1.7)          |
| <b>NPI nighttime behavior disturbances</b> |    |           |    |           |                             |
| Baseline                                   | 24 | 2.5 (3.6) | 26 | 2.5 (3.1) |                             |

|                                       |    |           |    |           |                    |
|---------------------------------------|----|-----------|----|-----------|--------------------|
| Day 14                                | 19 | 1.4 (2.8) | 23 | 2.2 (3.4) |                    |
| Day 21                                | 23 | 0.8 (2.0) | 24 | 1.8 (2.8) | -0.7 (-1.8 to 0.4) |
| NPI appetite and eating abnormalities |    |           |    |           |                    |
| Baseline                              | 24 | 3.1 (4.0) | 26 | 2.1 (3.4) |                    |
| Day 14                                | 19 | 2.8 (3.8) | 23 | 0.8 (1.9) |                    |
| Day 21                                | 23 | 2.0 (3.0) | 24 | 0.7 (1.6) | +1.0 (0.0 to 1.9)  |

---

Abbreviations: NPI, Neuropsychiatric Inventory

NOTE. Group numbers are means and standard deviations. Estimates of overall mean differences are based on linear mixed model analysis for repeated measures with participant as random effects. A negative mean difference favors THC for NPI subdomains.
